# Supplementary material for: High-throughput proteomic analysis reveals systemic dysregulation in virally suppressed people living with HIV
Source: JCI journal article supplement (doi:10.1172/jci.insight.166166), 2023-04-20
Supplement: sd3 [file 3]

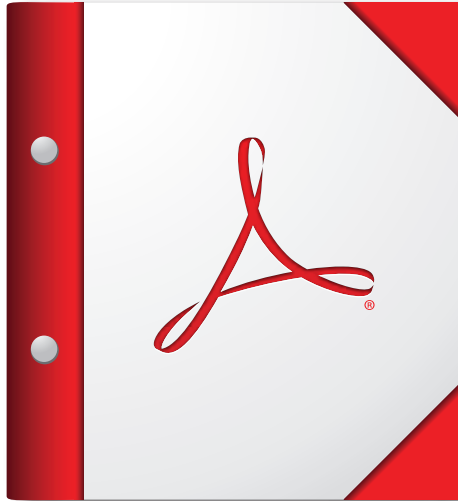

**For the best experience, open this PDF portfolio in  
Acrobat X or Adobe Reader X, or later.**

**Get Adobe Reader Now!**
